# Supplementary material for: T22-PE24-H6 Nanotoxin Selectively Kills CXCR4-High Expressing AML Patient Cells In Vitro and Potently Blocks Dissemination In Vivo
Source: MDPI journal article supplement (doi:10.3390/pharmaceutics15030727), 2023-02-22
Supplement: s1 [file s1]

A

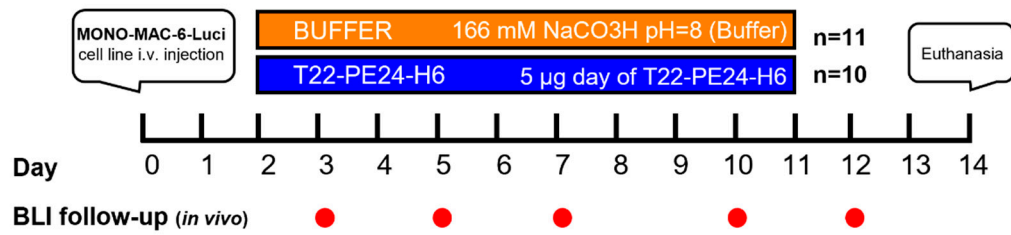

B

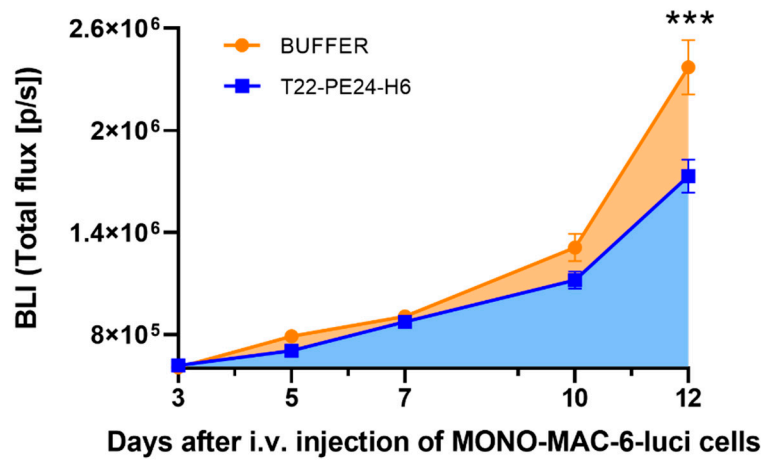

C

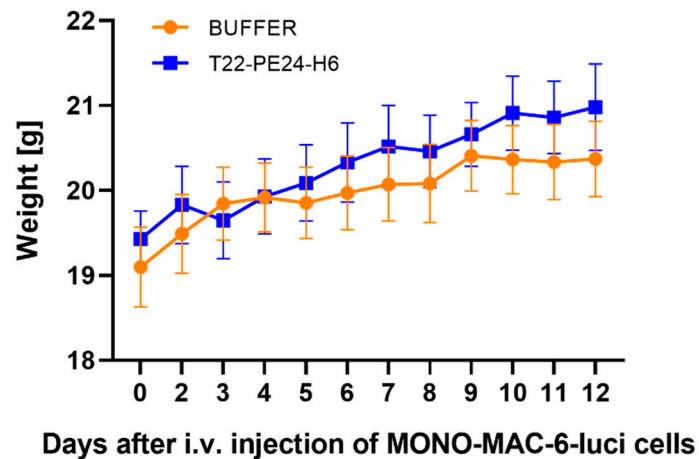

**Supplemental Figure S1. Experimental design and evolution of body weight of mice during the study of antineoplastic effect of T22-PE24-H6.** (A) Schematic diagram of *in vivo* experimental design. (B) Follow-up of AML dissemination of mice treated with buffer or T22-PE24-H6 over the time. (C) Mean body weights of mice exposed to repeated doses T22-PE24-H6 or buffer over 10 doses. Statistical analysis was performed using T-test or Mann-Whitney *U* test and significant differences between groups are indicated as \*\*\* $p \leq 0.005$ .
